# Supplementary material for: Scalable production of uniform and mature organoids in a 3D geometrically-engineered permeable membrane
Source: Research Square preprint supplement (doi:10.21203/rs.3.rs-3425714/v1), 2023-12-22
Supplement: Supplementary file 1 [file 23510ead10023a1f4be294af.docx]

Supplementary Information for

Scalable production of uniform and mature organoids in a 3D geometrically-engineered permeable membrane

Dohui Kim‡,1, Hyeonji Lim‡,2, Jaeseung Youn1, Tae-Eun Park2,*, Dong Sung Kim1,3,4,5*

1 Department of Mechanical Engineering, Pohang University of Science and Technology (POSTECH), Pohang, 37673, South Korea

2 Department of Biomedical Engineering, College of Information and Biotechnology, Ulsan National Institute of Science and Technology (UNIST), Ulsan, 44919, South Korea

3 Department of Chemical Engineering, Pohang University of Science and Technology (POSTECH), Pohang, 37673, South Korea

4 School of Interdisciplinary Bioscience and Bioengineering, Pohang University of Science and Technology (POSTECH), Pohang, 37673, South Korea

5 Institute for Convergence Research and Education in Advanced Technology, Yonsei University, Seoul, 03722, South Korea

‡These authors contributed to this work equally.

∗ Authors to whom any correspondence should be addressed.

E-mail: smkds@postech.ac.kr (D.S. Kim) and tepark@unist.ac.kr (T.E. Park)

**Table of Contents**

**Supplementary Notes4**

Supplementary Note 1. Optimization of kidney organoid differentiation protocol on hydrogel layer 4

Supplementary Note 2. Optimization of kidney organoid differentiation protocol in 3D culture platform5

Supplementary Note 3. Exploration of potential of UniMat to regulate initial aggregate size6

**Supplementary Tables8**

Supplementary Table 1. COV for sizes of kidney organoids in hydrogel layer and UniMat8

Supplementary Table 2. COV for structures of kidney organoids in hydrogel layer and UniMat 9

Supplementary Table 3. COV for gene expressions of kidney organoids in hydrogel layer and UniMat10

Supplementary Table 4. COV for organoid formation efficiency of kidney organoids in hydrogel layer and UniMat11

Supplementary Table 5. Count of cells in AggreWell and UniMat12

Supplementary Table 6. GO Term enriched in UniMat podocyte (POD) cluster13

Supplementary Table 7. GO Term enriched in UniMat proximal tubule (PT) and loop of Henle/distal tubule (LOH/DT) clusters14

Supplementary Table 8. GO Term enriched in UniMat endothelial cell (EC) cluster15

Supplementary Table 9. COV for structures of kidney organoids in AggreWell and UniMat16

Supplementary Table 10. COV for gene expressions of kidney organoids in AggreWell and UniMat17

Supplementary Table 11. Antibodies for immunostaining18

Supplementary Table 12. Primers for qRT-PCR19

Supplementary Table 13. Simulation parameters used to predict glucose diffusion profiles20

**Supplementary Figures21**

Supplementary Figure 1. Geometric characteristics of UniMat21

Supplementary Figure 2. Optimization of kidney organoid differentiation protocol on hydrogel layer22

Supplementary Figure 3. Optimization of kidney organoid differentiation protocol in 3D culture platform24

Supplementary Figure 4. Exploration of potential of UniMat to regulate initial aggregate size25

Supplementary Figure 5. Mature hiPSCs-derived kidney organoids in UniMat26

Supplementary Figure 6. Enhanced vascularization of hiPSCs-derived kidney organoids in UniMat27

Supplementary Figure 7. UMAP plot of distribution of kidney organoid cells in AggreWell and UniMat28

Supplementary Figure 8. UMAP plots of gene expression of kidney organoid cells in AggreWell and UniMat29

Supplementary Figure 9. Comparison of proportion of early proximal tubules (EPT) between AggreWell and UniMat30

Supplementary Figure 10. Confocal images of polycystic kidney disease (PKD) organoids31

**Supplementary Video Captions32**

Supplementary Video 1. Confocal z-stack movie of kidney organoids cultured in AggreWell stained with PODXL (cyan) and PECAM1 (red)32

Supplementary Video 2. Confocal z-stack movie of kidney organoids cultured in UniMat stained with PODXL (cyan) and PECAM1 (red)32

**References33**

**Supplementary Notes**

**Supplementary Note 1: Optimization of kidney organoid differentiation protocol on hydrogel layer**

The Morizane protocol1 stands as a well-established method for the differentiation of kidney organoids from both human embryonic stem cells (hESCs) and human induced pluripotent stem cells (hiPSCs). In this study, we directed our focus towards the optimization of the Morizane protocol, specifically tailored to hiPSCs. Leveraging the original Morizane protocol (**Supplementary Fig. 2a**), we meticulously optimized the concentration of growth factors and small molecules to differentiate hiPSCs into kidney organoids. Initially, we fine-tuned the concentrations of both CHIR99021 (CHIR) and Noggin to facilitate the induction of late primitive streak, using WTC11 hiPSCs (**Supplementary Fig. 2b**). Notably, when assessing the mRNA expression levels of *TBX6* in day 4 cells, we observed statistically significant increases in mRNA expression when exposed to CHIR concentrations of 8 and 10 µM, in comparison to concentrations of 3 and 6 µM (**Supplementary Fig. 2c**). Furthermore, the treatment with 10 ng/ml of Noggin resulted in elevated mRNA expression of *TBX6*, compared to the 5 ng/ml Noggin treatment (**Supplementary Fig. 2c**). Subsequently, while maintaining the original Morizane protocol unchanged, we successfully induced the formation of kidney organoids on a Geltrex hydrogel layer by day 21 (**Supplementary Fig. 2d**). To validate the robustness and versatility of our optimized protocol, we conducted independent replication experiments employing a different hiPSCs line, IMR90-4 (**Supplementary Fig. 2e**). Impressively, our optimized protocol consistently demonstrated its proficiency in inducing kidney organoids on the hydrogel layer (**Supplementary Fig. 2e**), thereby reaffirming its reliability and adaptability for hiPSCs-derived kidney organoid differentiations.

**Supplementary Note 2: Optimization of kidney organoid differentiation protocol in 3D culture platform**

Having established a robust hiPSCs-derived kidney organoid differentiation protocol on a hydrogel layer, we endeavored to adapt this protocol to a 3D culture platform. Specifically, we explored two different 3D culture platforms: the 96-well, round-bottom, ultra-low-attachment plate (96-well plate) and the AggreWell™ Microwell Plate (AggreWell). Inspired by the original procedural steps of the Morizane protocol from day 9 to day 21 (**Supplementary Fig. 3a**), our optimization focused on the period from day 11 to day 14, employing WTC11 hiPSCs. Notably, our findings diverged from the original Morizane protocol. We discovered that the administrating FGF9 at a concentration of 30 ng/ml, supplemented with 1.5% fetal bovine serum (FBS), enhanced the induction of renal vesicle formation (**Supplementary Fig. 3b**). Furthermore, we confirmed the indispensable role of FBS in sustaining organoid differentiation after FGF9 removal from day 14 onwards. Subsequently, we successfully induced the formation of kidney organoids using our optimized protocol (**Supplementary Fig. 3c**) in both the 96-well plate and the AggreWell by day 21 (**Supplementary Fig. 3d**). To validate the robustness and versatility of our optimized protocol, we conducted independent replication experiments utilizing the different hiPSC line, IMR90-4 (**Supplementary Fig. 3e**). Impressively, our optimized protocol consistently demonstrated its proficiency in inducing kidney organoids within the 3D culture platforms (**Supplementary Fig. 3e**), thus reaffirming its reliability and adaptability for hiPSC-derived kidney organoid differentiations within 3D culture platforms.

**Supplementary Note 3: Exploration of potential of UniMat to regulate initial aggregate size**

In our investigation to estimate the initial aggregate size within a single microwell of the UniMat, we started with the assumption that the total volume of seeded cells was equivalent to the aggregate size. In this study, cells were seeded at a density of approximately 960,000 cells per UniMat, enabling to calculate the average number of cells within individual microwells of the UniMat (**Supplementary Fig. 4c**). To facilitate our estimation, we employed a simplified geometry of the microwell within UniMat (**Supplementary Fig. 4d**). In addition, we measured the diameter of an individual suspended cell, which was approximately 10 μm. Based on our data, we inferred that the diameter of the initial aggregate aligns with the diameter of the uppermost cell layer when cells are vertically stacked within a microwell (**Supplementary Fig. 4e**). Upon analysis, we observed that the estimated sizes closely matched but were slightly below the measured sizes (**Supplementary Fig. 4f**). This discrepancy could be due to factors inherent in our estimation method. The primary assumption behind our method was perfect cell packing within the microwells, with the initial aggregate size equating to the total cell volume. In practice, the packing of the aggregate within a microwell might not be uniformly dense, leading to differences between the estimated and actual sizes. Additionally, cells often tend to form clumps or clusters, particularly when cultured at high cell densities. Such cellular aggregates might not have been fully accounted for in our estimation, consequently contributing to disparity between the estimated and measured aggregate sizes. Nonetheless, it is noteworthy that the measured sizes closely approximated the estimated sizes (**Supplementary Fig. 4f**), as determined from the geometrical data of the microwells and the average number of cell sedimentations per microwell in each UniMat. This suggests that, despite the complexities in estimating initial aggregate size, our method provided reasonably accurate estimations within the context of this study.

**Supplementary Tables**

**Supplementary Table 1**. **COV** **for sizes of kidney organoids in hydrogel layer and UniMat.** Calculation of COV for diameters of kidney organoids formed in hydrogel layer, UniMat400, UniMat600, and UniMat800.

|  | **Diameters of kidney organoids (µm)** | | |
| --- | --- | --- | --- |
|  | **Mean** | **SD** | **COV** |
| Hydrogel layer | 276.80 | 58.68 | 21.20 |
| UniMat400 | 178.17 | 15.67 | 8.79 |
| UniMat600 | 258.14 | 15.11 | 5.85 |
| UniMat800 | 281.08 | 8.04 | 2.86 |

**Supplementary Table 2**. **Cov for structures of kidney organoids in hydrogel layer and UniMat.** COV for PODXL+ podocytes, LTL+ proximal tubules, and CDH1+ distal tubules volume in individual kidney organoids formed in hydrogel layer, UniMat400, UniMat600, and UniMat800.

|  | **PODXL+ podocytes volume in individual kidney organoids (105 µm3)** | | |
| --- | --- | --- | --- |
|  | **Mean** | **SD** | **COV** |
| Hydrogel layer | 6.96 | 2.92 | 41.92 |
| UniMat400 | 3.90 | 0.75 | 19.22 |
| UniMat600 | 8.16 | 0.85 | 10.41 |
| UniMat800 | 9.51 | 0.45 | 4.68 |
|  | **LTL+ podocytes volume in individual kidney organoids (105 µm3)** | | |
|  | **Mean** | **SD** | **COV** |
| Hydrogel layer | 10.41 | 4.67 | 44.84 |
| UniMat400 | 4.46 | 0.86 | 19.24 |
| UniMat600 | 7.89 | 0.85 | 10.83 |
| UniMat800 | 14.99 | 0.75 | 4.98 |
|  | **CDH1+ podocytes volume in individual kidney organoids (105 µm3)** | | |
|  | **Mean** | **SD** | **COV** |
| Hydrogel layer | 9.62 | 4.11 | 42.71 |
| UniMat400 | 4.59 | 0.64 | 13.98 |
| UniMat600 | 8.08 | 0.95 | 11.73 |
| UniMat800 | 10.59 | 0.90 | 8.47 |

**Supplementary Table 3**. **COV** **for gene expressions of kidney organoids in hydrogel layer and UniMat.** COV of variation for *PODXL*, *SLC34A1*, and *CDH1* gene expressions of kidney organoids cultured in hydrogel layer and UniMat.

|  | **mRNA expression ratio of *PODXL*** | | |
| --- | --- | --- | --- |
|  | **Mean** | **SD** | **COV** |
| Hydrogel layer | 1.00 | 0.60 | 59.59 |
| UniMat | 1.12 | 0.25 | 22.31 |
|  | **mRNA expression ratio of *SLC34A1*** | | |
|  | **Mean** | **SD** | **COV** |
| Hydrogel layer | 1.00 | 0.75 | 74.92 |
| UniMat | 1.32 | 0.17 | 13.08 |
|  | **mRNA expression ratio of *CDH1*** | | |
|  | **Mean** | **SD** | **COV** |
| Hydrogel layer | 1.00 | 0.47 | 47.37 |
| UniMat | 1.41 | 0.13 | 9.12 |

**Supplementary Table 4**. **COV for organoid formation efficiency of kidney organoids in hydrogel layer and UniMat.** COV of variation for organoid formation efficiencyof kidney organoids in hydrogel layer and UniMat.

|  | **Number of organoids per mm2** | | |
| --- | --- | --- | --- |
|  | **Mean** | **SD** | **COV** |
| **Hydrogel layer** |  |  |  |
| Batch 1 | 1.43 | 0.25 | 17.21 |
| Batch 2 | 0.89 | 0.31 | 35.00 |
| Batch 3 | 1.86 | 0.38 | 20.44 |
| **UniMat** |  |  |  |
| Batch 1 | 3.24 | 0.15 | 4.53 |
| Batch 2 | 3.18 | 0.10 | 3.27 |
| Batch 3 | 3.10 | 0.14 | 4.37 |

**Supplementary Table 5. Count of cells in AggreWell and UniMat.**

| **Cluster** | **Cell type** | **AggreWell** | **UniMat** |
| --- | --- | --- | --- |
| POD | Podocyte | 2,254 | 311 |
| EPT | Proximal tubule | 1,903 | 443 |
| PT | Proximal tubule | 1,162 | 1,930 |
| LOH/DT | Distal tubule | 989 | 1,212 |
| EC | Endothelial cell | 106 | 45 |
| JG | Juxtaglomeruluar cell | 250 | 23 |
| Mesen.1 | Mesenchyme | 1,941 | 2,863 |
| Mesen.2 | Mesenchyme | 1,887 | 2,215 |
| Mesen.3 | Mesenchyme | 2,218 | 903 |
| Mesen.4 | Mesenchyme | 248 | 355 |
| Mesen.5 | Mesenchyme | 98 | 21 |
| NPC | Nephron progenitor cell | 931 | 523 |
| Tub.pre | Tubular precursor | 125 | 421 |
| Prolif.Mesen.1 | Proliferating mesenchyme | 1,962 | 654 |
| Prolif.Mesen.2 | Proliferating mesenchyme | 715 | 804 |
| Muscle | Muscle | 623 | 375 |

**Supplementary Table 6. GO Term enriched in UniMat podocyte (POD) cluster.**

| **GO Terms** | | **Fold enrichment** | **p-value** |
| --- | --- | --- | --- |
| GO:0019064 | fusion of virus membrane with host plasma membrane | 17.60641 | 0.010244 |
| GO:1905274 | regulation of modification of postsynaptic actin cytoskeleton | 17.60641 | 0.010244 |
| GO:0099638 | endosome to plasma membrane protein transport | 17.60641 | 0.010244 |
| GO:0032835 | glomerulus development | 14.67201 | 1.99E-04 |
| GO:0061795 | Golgi lumen acidification | 14.08513 | 2.90E-05 |
| GO:0072284 | metanephric S-shaped body morphogenesis | 14.08513 | 0.016594 |
| GO:1905636 | positive regulation of RNA polymerase II regulatory region sequence-specific DNA binding | 14.08513 | 0.016594 |
| GO:0031340 | positive regulation of vesicle fusion | 14.08513 | 0.016594 |
| GO:0032510 | endosome to lysosome transport via multivesicular body sorting pathway | 14.08513 | 0.016594 |
| GO:0032836 | glomerular basement membrane development | 11.73761 | 5.56E-04 |

**Supplementary Table 7. GO Term enriched in UniMat proximal tubule (PT) and loop of Henle/distal tubule (LOH/DT) clusters.**

| **GO Terms** | | **Fold enrichment** | **p-value** |
| --- | --- | --- | --- |
| GO:1900212 | negative regulation of mesenchymal cell apoptotic process involved in metanephros development | 32.46488 | 0.002774 |
| GO:2000611 | positive regulation of thyroid hormone generation | 24.34866 | 0.005436 |
| GO:0072221 | metanephric distal convoluted tubule development | 24.34866 | 0.005436 |
| GO:1901890 | positive regulation of cell junction assembly | 24.34866 | 0.005436 |
| GO:0072050 | S-shaped body morphogenesis | 24.34866 | 0.005436 |
| GO:0072289 | metanephric nephron tubule formation | 24.34866 | 0.005436 |
| GO:0048793 | pronephros development | 21.64326 | 5.40E-04 |
| GO:0072197 | ureter morphogenesis | 21.64326 | 5.40E-04 |
| GO:0006122 | mitochondrial electron transport, ubiquinol to cytochrome c | 18.55136 | 7.14E-08 |
| GO:0045333 | cellular respiration | 16.23244 | 1.11E-19 |

**Supplementary Table 8. GO Term enriched in UniMat endothelial cell (EC) cluster.**

| **GO Terms** | | **Fold enrichment** | **p-value** |
| --- | --- | --- | --- |
| GO:0003209 | cardiac atrium morphogenesis | 22.57442 | 4.18E-04 |
| GO:0061333 | renal tubule morphogenesis | 21.16352 | 0.007154 |
| GO:0003273 | cell migration involved in endocardial cushion formation | 21.16352 | 0.007154 |
| GO:1905686 | positive regulation of plasma membrane repair | 21.16352 | 0.007154 |
| GO:1990410 | adrenomedullin receptor signaling pathway | 21.16352 | 0.007154 |
| GO:0070668 | positive regulation of mast cell proliferation | 21.16352 | 0.007154 |
| GO:0061299 | retina vasculature morphogenesis in camera-type eye | 18.81202 | 8.14E-04 |
| GO:0060956 | endocardial cell differentiation | 16.93081 | 0.011645 |
| GO:0002248 | connective tissue replacement involved in inflammatory response wound healing | 16.93081 | 0.011645 |
| GO:0030035 | microspike assembly | 16.93081 | 0.011645 |

**Supplementary Table 9. COV for structures of kidney organoids in AggreWell and UniMat.** COV of variation for PODXL+ podocytes, LTL+ proximal tubules, and CDH1+ distal tubules volume in individual kidney organoids formed in AggreWell and UniMat.

|  | **PODXL+ podocytes volume in individual kidney organoids (105 µm3)** | | |
| --- | --- | --- | --- |
|  | **Mean** | **SD** | **COV** |
| AggreWell | 8.44 | 1.17 | 13.82 |
| UniMat | 9.51 | 0.45 | 4.68 |
|  | **LTL+ podocytes volume in individual kidney organoids (105 µm3)** | | |
|  | **Mean** | **SD** | **COV** |
| AggreWell | 9.53 | 1.34 | 14.05 |
| UniMat | 14.99 | 0.75 | 4.98 |
|  | **CDH1+ podocytes volume in individual kidney organoids (105 µm3)** | | |
|  | **Mean** | **SD** | **COV** |
| AggreWell | 8.13 | 1.29 | 15.83 |
| UniMat | 10.59 | 0.90 | 8.47 |

**Supplementary Table 10. COV for gene expressions of kidney organoids in AggreWell and UniMat**. COV of *PODXL*, *SLC34A1*, and *CDH1* gene expressions of kidney organoids cultured in AggreWell and UniMat.

|  | **mRNA expression ratio of *PODXL*** | | |
| --- | --- | --- | --- |
|  | **Mean** | **SD** | **COV** |
| AggreWell | 1.00 | 0.63 | 62.99 |
| UniMat | 5.10 | 0.10 | 2.03 |
|  | **mRNA expression ratio of *SLC34A1*** | | |
|  | **Mean** | **SD** | **COV** |
| AggreWell | 1.00 | 0.42 | 42.00 |
| UniMat | 4.09 | 0.18 | 4.33 |
|  | **mRNA expression ratio of *CDH1*** | | |
|  | **Mean** | **SD** | **COV** |
| AggreWell | 1.00 | 0.51 | 51.23 |
| UniMat | 5.62 | 0.35 | 6.29 |

**Supplementary Table 11. Antibodies for immunostaining.**

| **Antibody** | **Source** | **Catalog #** | **Host species & reactivity** | **Concentration** |
| --- | --- | --- | --- | --- |
| PODXL | R&D Systems | AF1658 | Goat anti-human | 1:300 |
| LTL | Vector Labs | B-1325-2 | N/A | 1:200 |
| CDH1 | Abcam | ab40772 | Rabbit anti-human | 1:300 |
| PECAM1 | Abcam | ab9498 | Mouse anti-human | 1:300 |
| ZO-1 | ThermoFisher | 40-2200 | Rabbit anti-human | 1:300 |

**Supplementary Table 12. Primers for qRT-PCR.**

| **Gene** | **Forward** | **Reverse** |
| --- | --- | --- |
| *ABCB1* | GGGAGCTTAACACCCGACTTA | GCCAAAATCACAAGGGTTAGCTT |
| *AQP1* | TAACCCTGCTCGGTCCTTTG | AGTCGTAGATGAGTACAGCCAG |
| *CDH1* | ATTTTTCCCTCGACACCCGAT | TCCCAGGCGTAGACCAAGA |
| *GAPDH* | TGTGGGCATCAATGGATTTGG | ACACCATGTATTCCGGGTCAAT |
| *NPSH1* | GGCTCCCAGCAGAAACTCTT | CACAGACCAGCAACTGCCTA |
| *PECAM1* | AACAGTGTTGACATGAAGAGCC | TGTAAAACAGCACGTCATCCTT |
| *PODXL* | GATAAGTGCGGCATACGGCT | GCTCGTACACATCCTTGGCA |
| *SLC34A1* | TCACGAAGCTCATCATCCAG | TTCCTCAGGGACTCATCACC |
| *TBX6* | CATCCACGAGAATTGTACCCG | AGCAATCCAGTTTAGGGGTGT |
| *UMOD* | ATGTGGGGCCAATGACATGAA | CAGTCCCGGTTGTCTCTGT |

**Supplementary Table 13. Simulation parameters used to predict glucose diffusion profiles.**

| **Parameter** | **Value** | **Ref.** |
| --- | --- | --- |
| Density of culture medium (kg/m3) | 1030 | 2 |
| Dynamic viscosity of culture medium (Pa⋅s) | 0.0025 | 2 |
| Glucose diffusion coefficient in culture medium (µm2/s) | 580 | 3 |
| Initial glucose concentration in culture medium (mM) | 21 | Experimentally measured |
| Porosity of UniMat_ZP | 0 | Experimentally measured |
| Porosity of UniMat_LP | 0.1 | Experimentally measured |
| Porosity of UniMat | 0.4 | Experimentally measured |
| Glucose consumption rate (mol/cell⋅s) | 3.9 × 10-17 | 4 |

**Supplementary Figures**

**
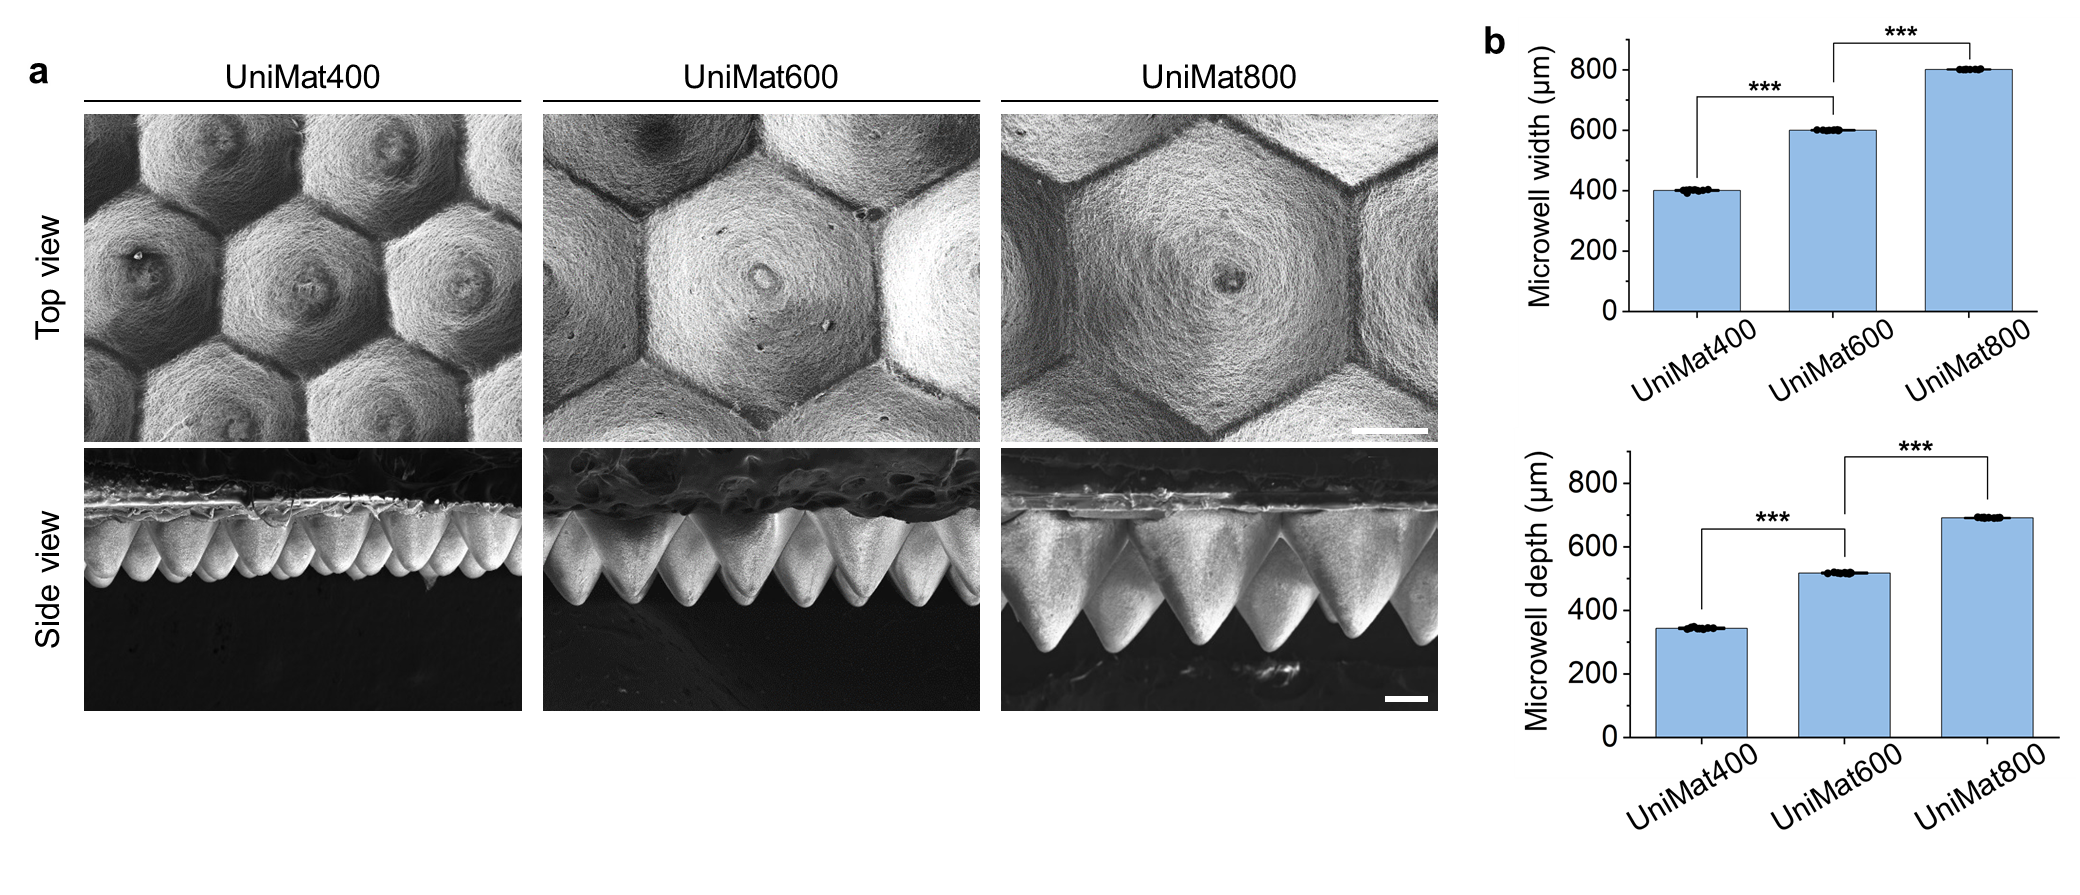
Supplementary Figure 1. Geometric characteristics of UniMat.** (a) SEM images of UniMat400, UniMat600, and UniMat800. Scale bars = 200 µm. (b) Width and depth of microwell within UniMat400, UniMat600, and UniMat800. (n = 10; ****P* < 0.0001).


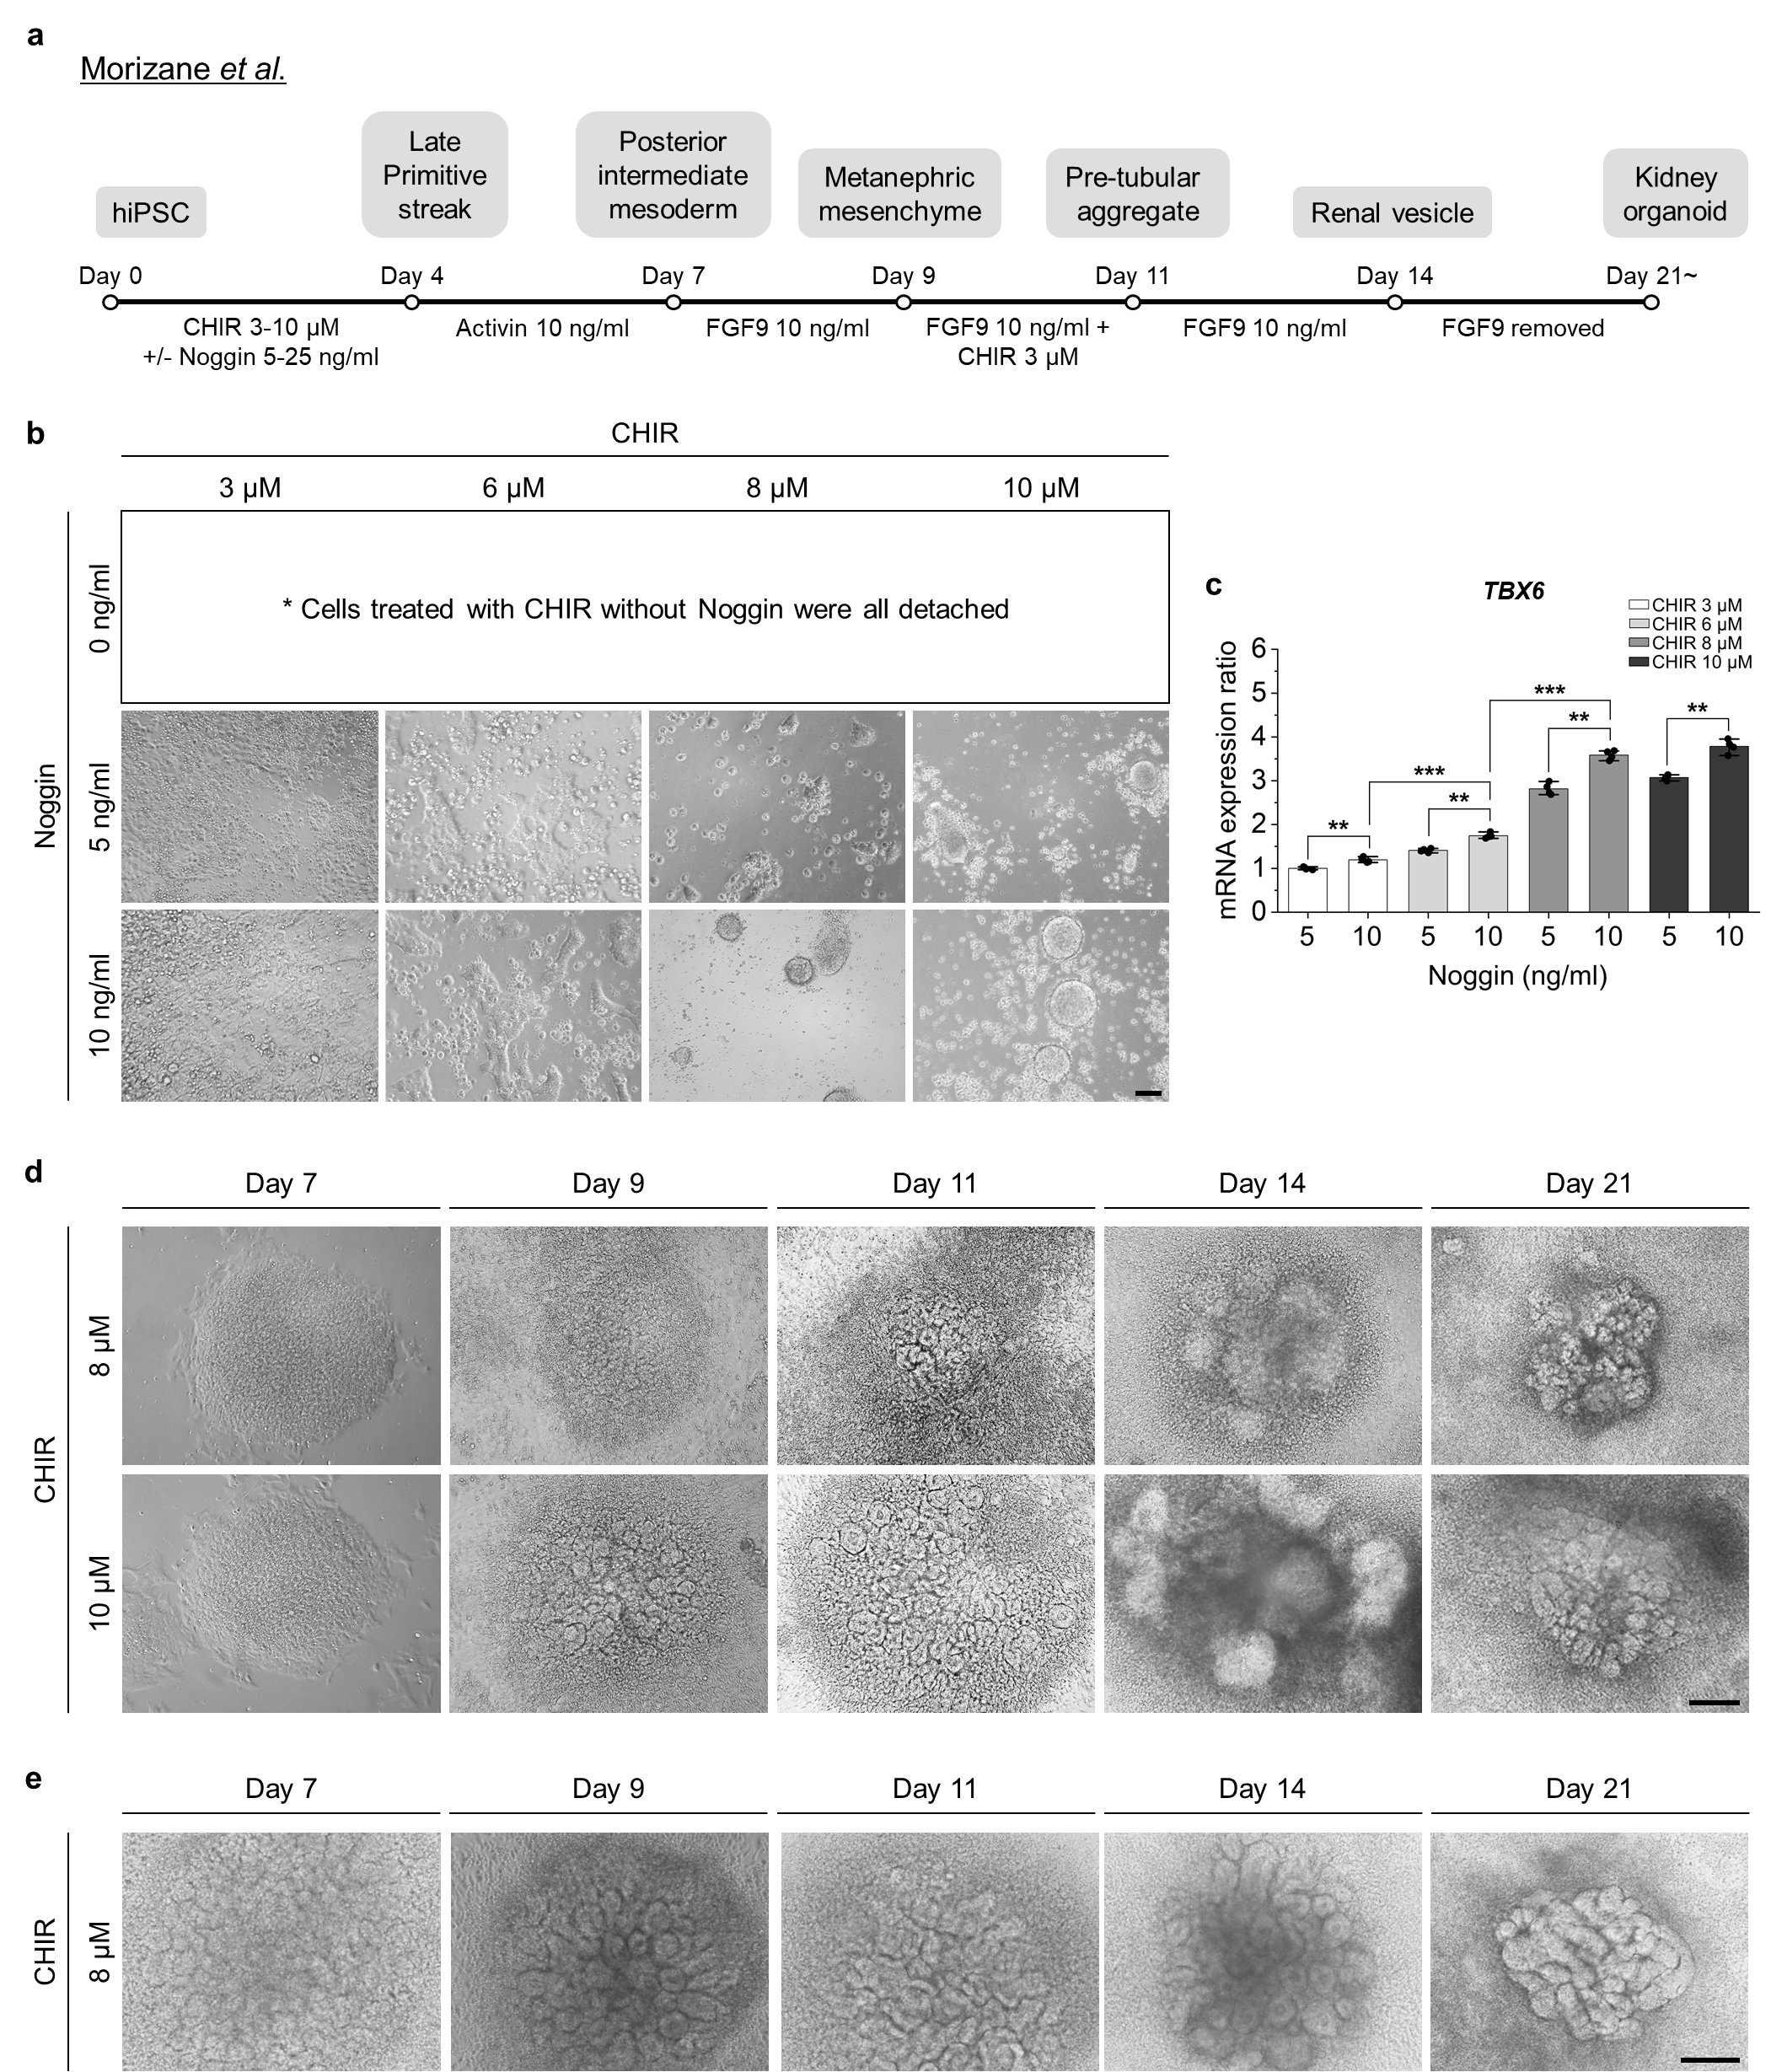


**Supplementary Figure 2. Optimization of kidney organoid differentiation protocol on hydrogel layer.** (a) Schematic of Morizane protocol1 for generation of kidney organoids on Geltrex hydrogel layer. (b) Optimization of CHIR 99021 (CHIR) and Noggin concentrations for differentiation of late primitive streak at day 4 on hydrogel layer using WTC11 hiPSCs. Scale bar = 200 µm(c) qRT-PCR of *TBX6* expression of differentiated WTC11 hiPSCs at day 4 on hydrogel layer with varied CHIR concentrations (3, 6, 8, and 10 µM) and Noggin concentrations (0, 5, and 10 ng/ml) (n = 4; ***P* < 0.001, ****P* < 0.0001). (d) Bright field images showing progression of kidney organoid differentiation under optimal CHIR concentration of 8 or 10 µM and Noggin concentration of 10 ng/ml (from day 0 to day 4) on hydrogel layer using WTC11 hiPSCs. Scale bar = 100 µm. (e) Bright field images showing progression of kidney organoid differentiation under optimal CHIR concentration of 8 µM and Noggin concentration of 10 ng/ml (from day 0 to day 4) on hydrogel layer using IMR90-4 hiPSCs.


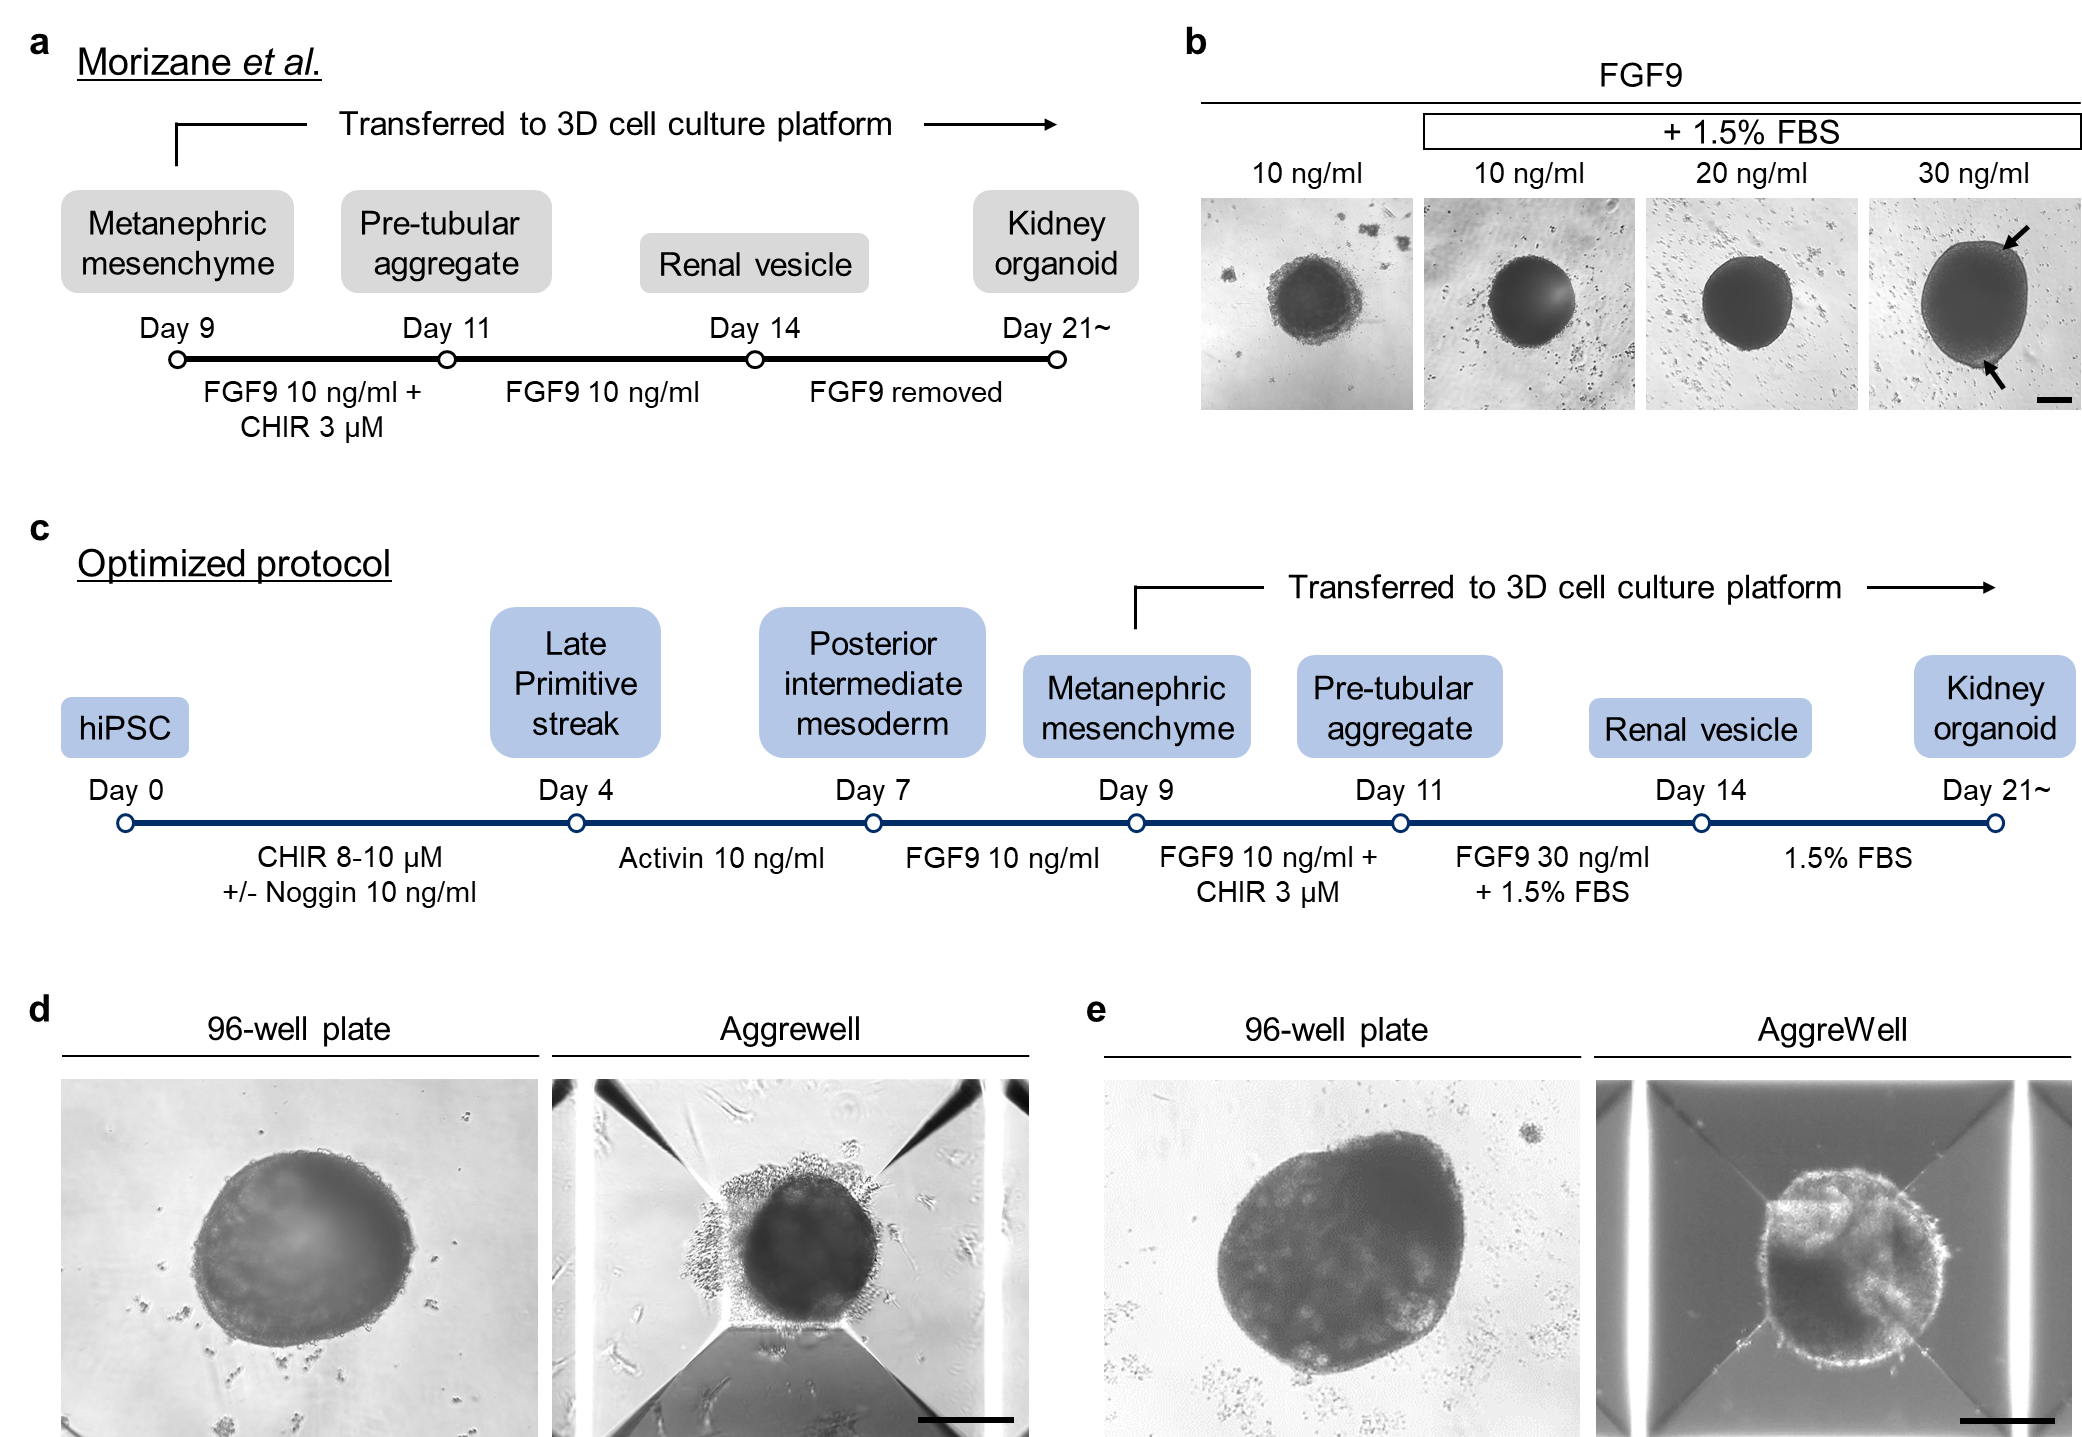


**Supplementary Figure 3. Optimization of kidney organoid differentiation protocol in 3D culture platform.** (a) Schematic of Morizane protocol's procedural steps1 from day 9 to day 21 for generation of kidney organoids in 3D culture platform. (b) Optimization of FGF9 concentration and FBS treatment for differentiation of renal vesicle (black arrows) at day 14 on 96-well, round-bottom, ultra-low-attachment plates (96-well plate) using WTC11 hiPSCs. Scale bar = 200 µm.(c) Schematic of optimized protocol employed in this study for generation of kidney organoids in 3D culture platform. (d) Bright field images showing kidney organoid differentiated at day 21 under optimal FGF9 concentration of 30 ng/ml (from day 9 to day 14) and 1.5% fetal bovine serum (FBS) treatment (from day 9) in 96-well plate and AggreWell™800 Microwell Plates (Aggrewell) using WTC11 hiPSCs. Scale bar = 200 µm. (e) Bright field images showing kidney organoid differentiated at day 21 under optimal FGF9 concentration of 30 ng/ml (from day 9 to day 14) and 1.5% FBS treatment (from day 9) in 96-well plate and AggreWell using IMR90-4 hiPSCs. Scale bar = 200 µm.

**
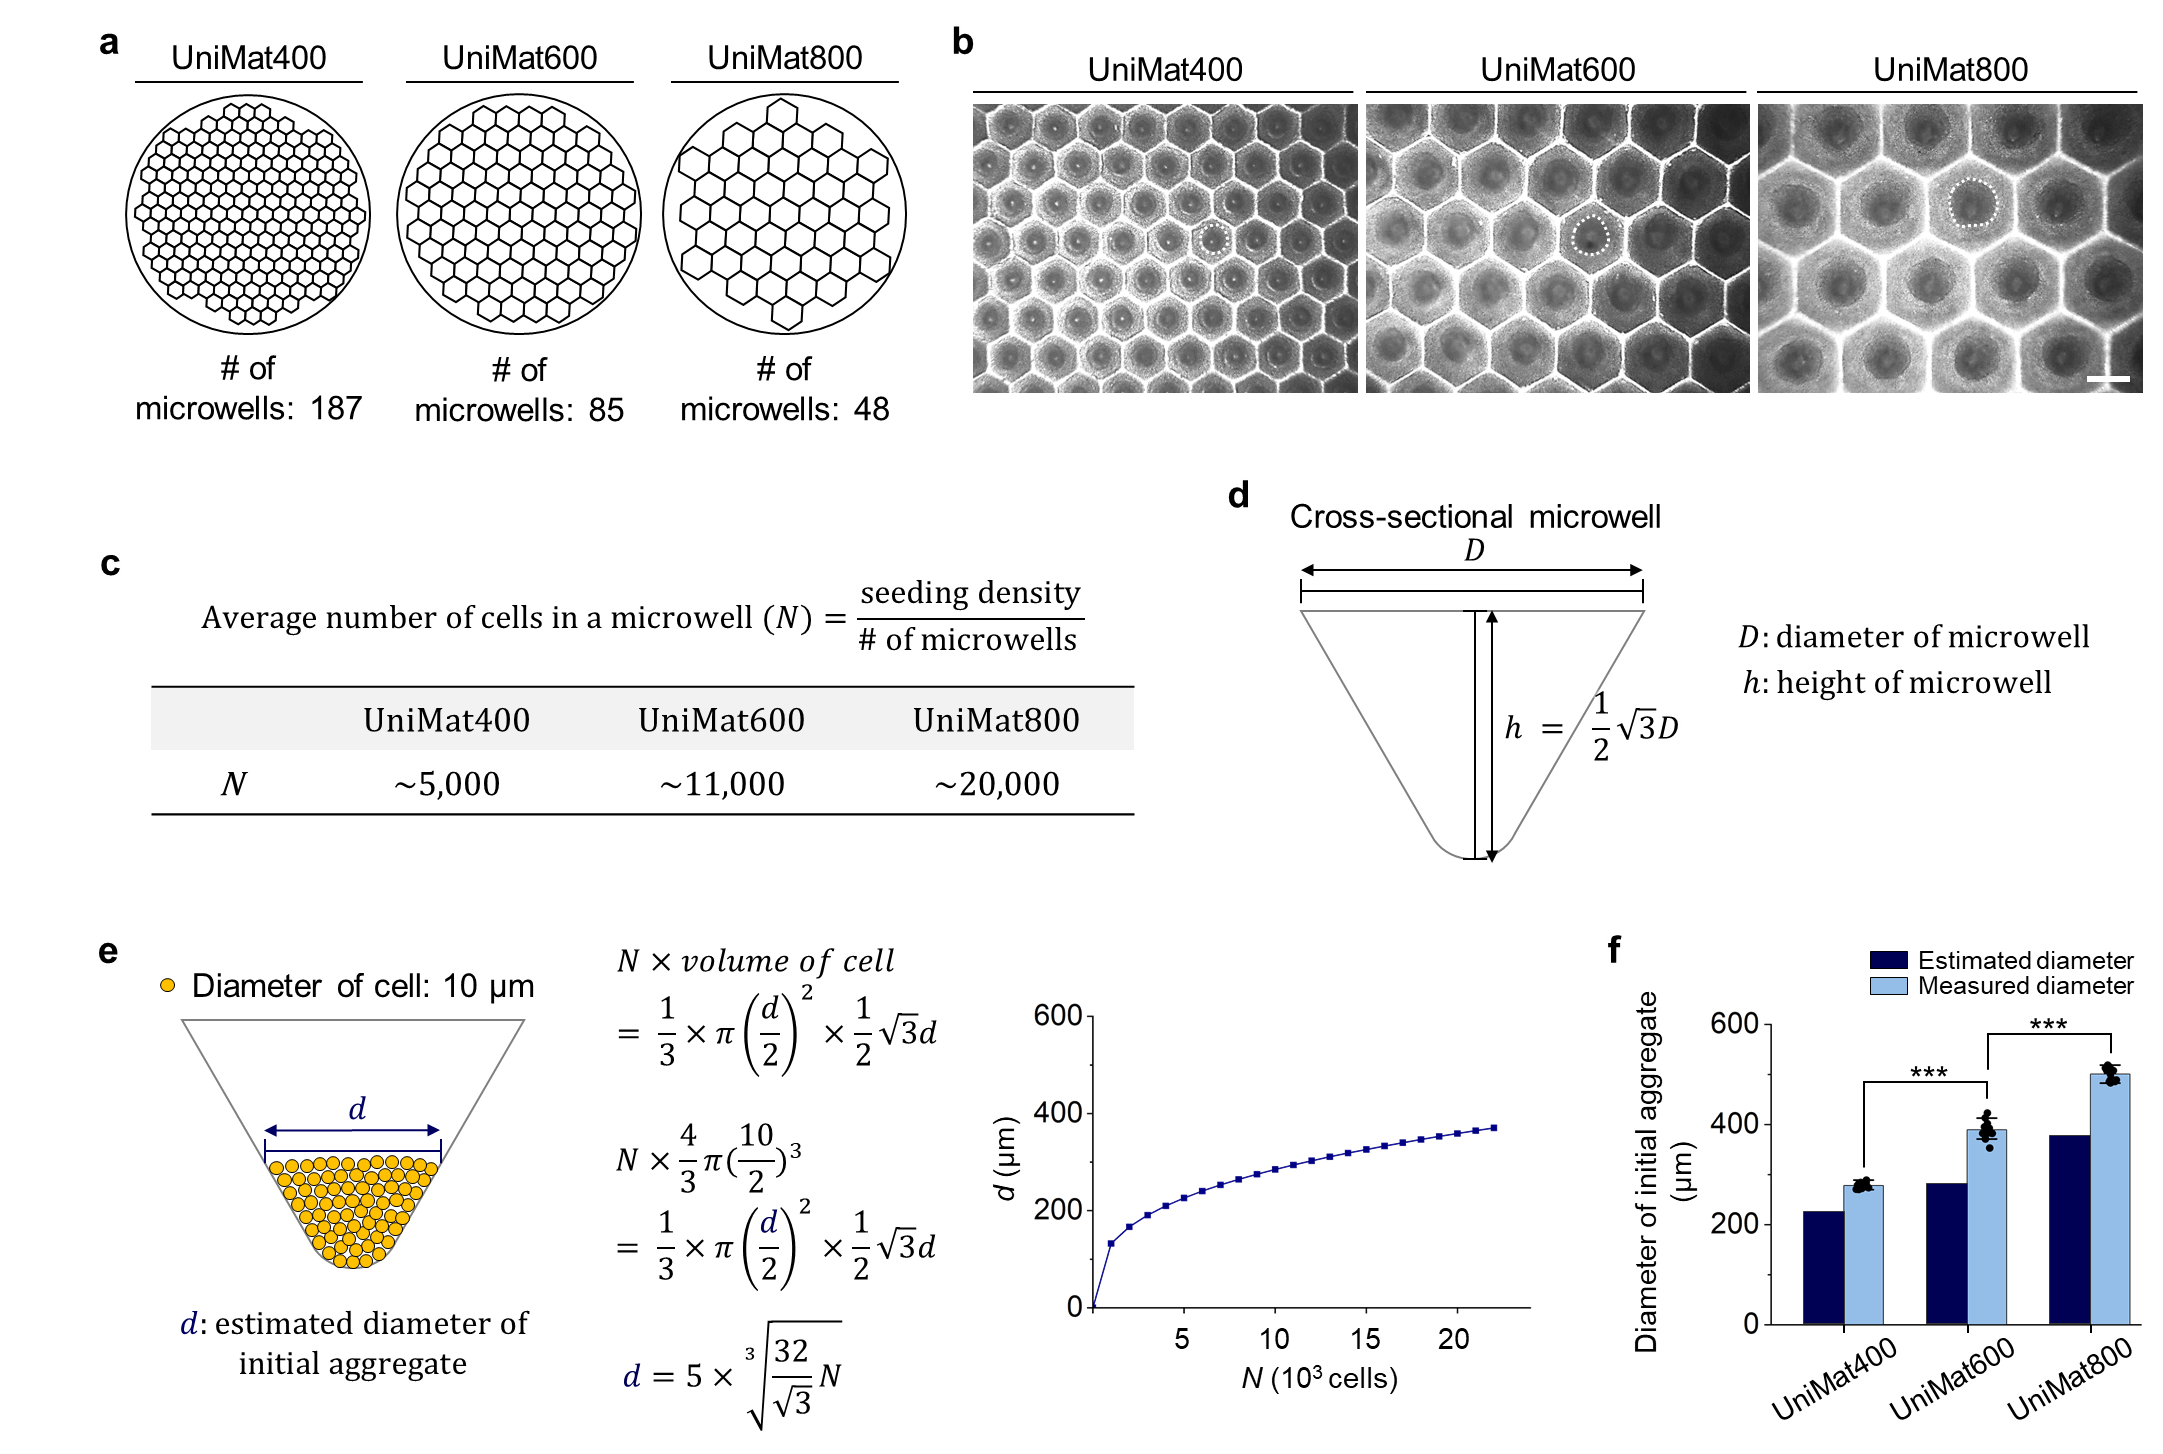
 Supplementary Figure 4. Exploration of potential of UniMat to regulate initial aggregate size.** (a) Top view schematics of UniMat400, UniMat600, and UniMat800 with array of microwells within each configuration. (b) Bright field images of initial aggregates in UniMat400, UniMat600, and UniMat800. Scale bar = 400 µm. White dotted lines in each image highlight perimeters of aggregates. (c) Average number of seeded cells in single microwell of UniMat400, UniMat600, and UniMat800. (d) Schematic of simplified cross-sectional geometry of single microwell within UniMat. (e) Estimation of initial aggregate diameter in single microwell as function of average number of seeded cells. (f) Estimated and measured diameters of initial aggregate in individual microwells of UniMat400, UniMat600, and UniMat800. (n = 15; ****P* < 0.0001).

**
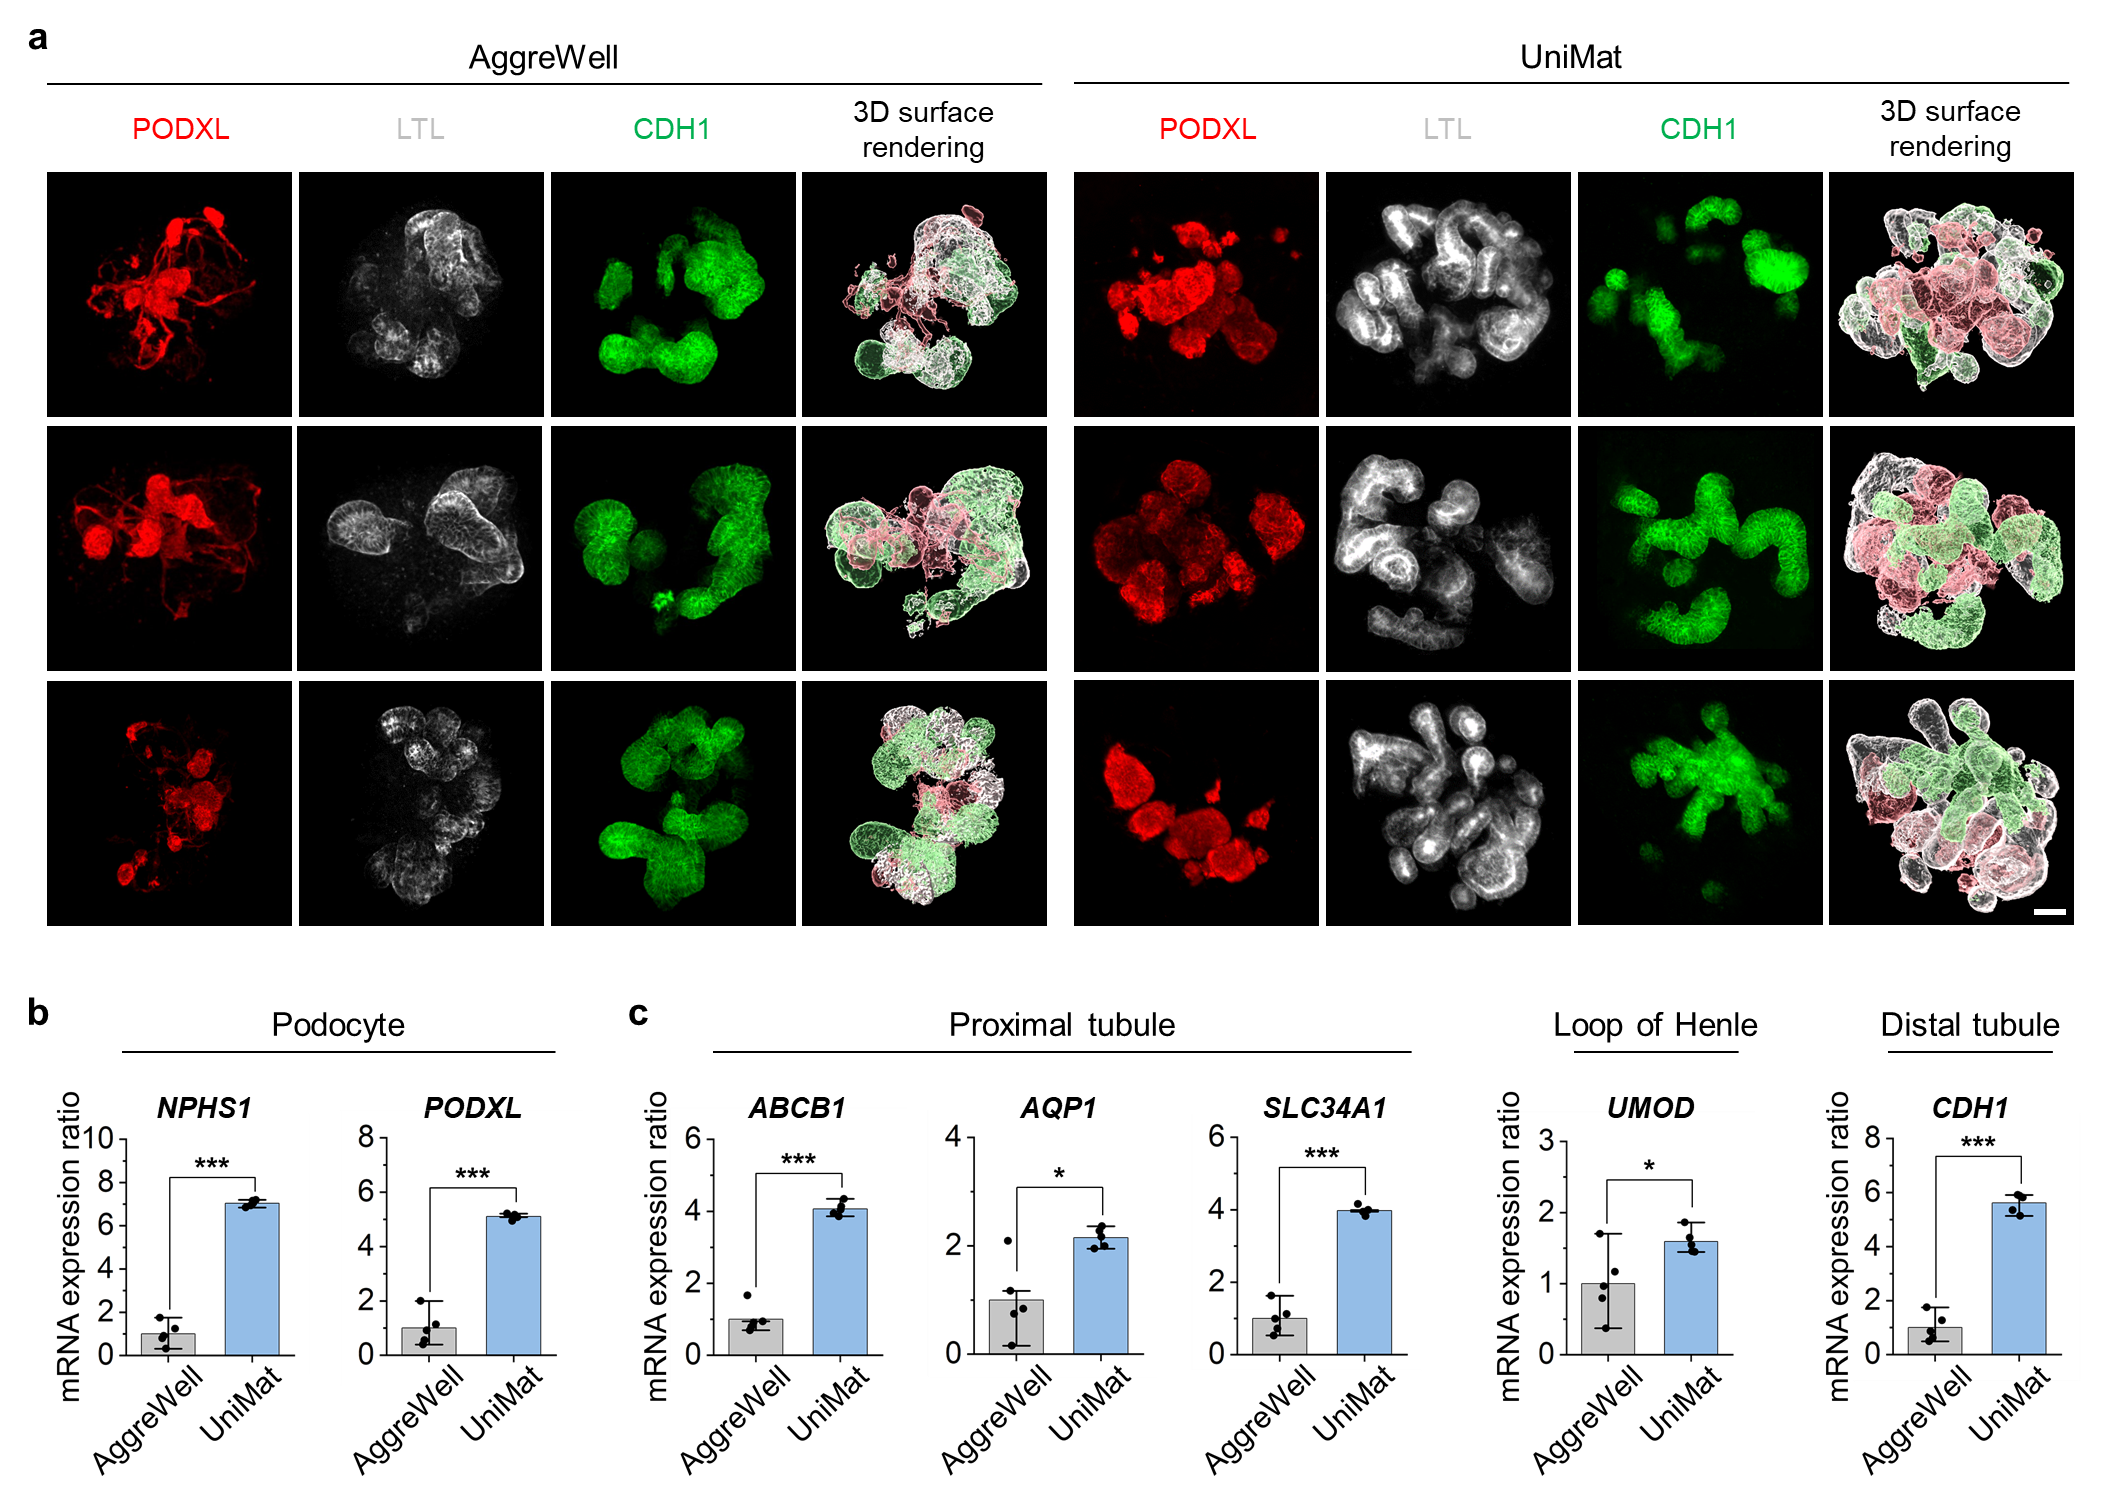
Supplementary Figure 5. Mature hiPSCs-derived kidney organoids in UniMat.** (a)Confocal z-stack images for markers of podocytes (PODXL), proximal tubules (LTL), and distal tubules (CDH1), and corresponding Imaris 3D surface rendering images of kidney organoids cultured in AggreWell and UniMat. Scale bar = 50 µm. (b) qRT-PCR of *NPHS1* and *PODXL* expressions of kidney organoids cultured in AggreWell and UniMat (n = 5; ****P* < 0.0001). (c) qRT-PCR of *ABCB1*, *AQP1*, *SLC34A1*, *UMOD*, and *CDH1* expressions of kidney organoids cultured in AggreWell and UniMat (n = 5; ***P* < 0.001 ****P* < 0.0001).


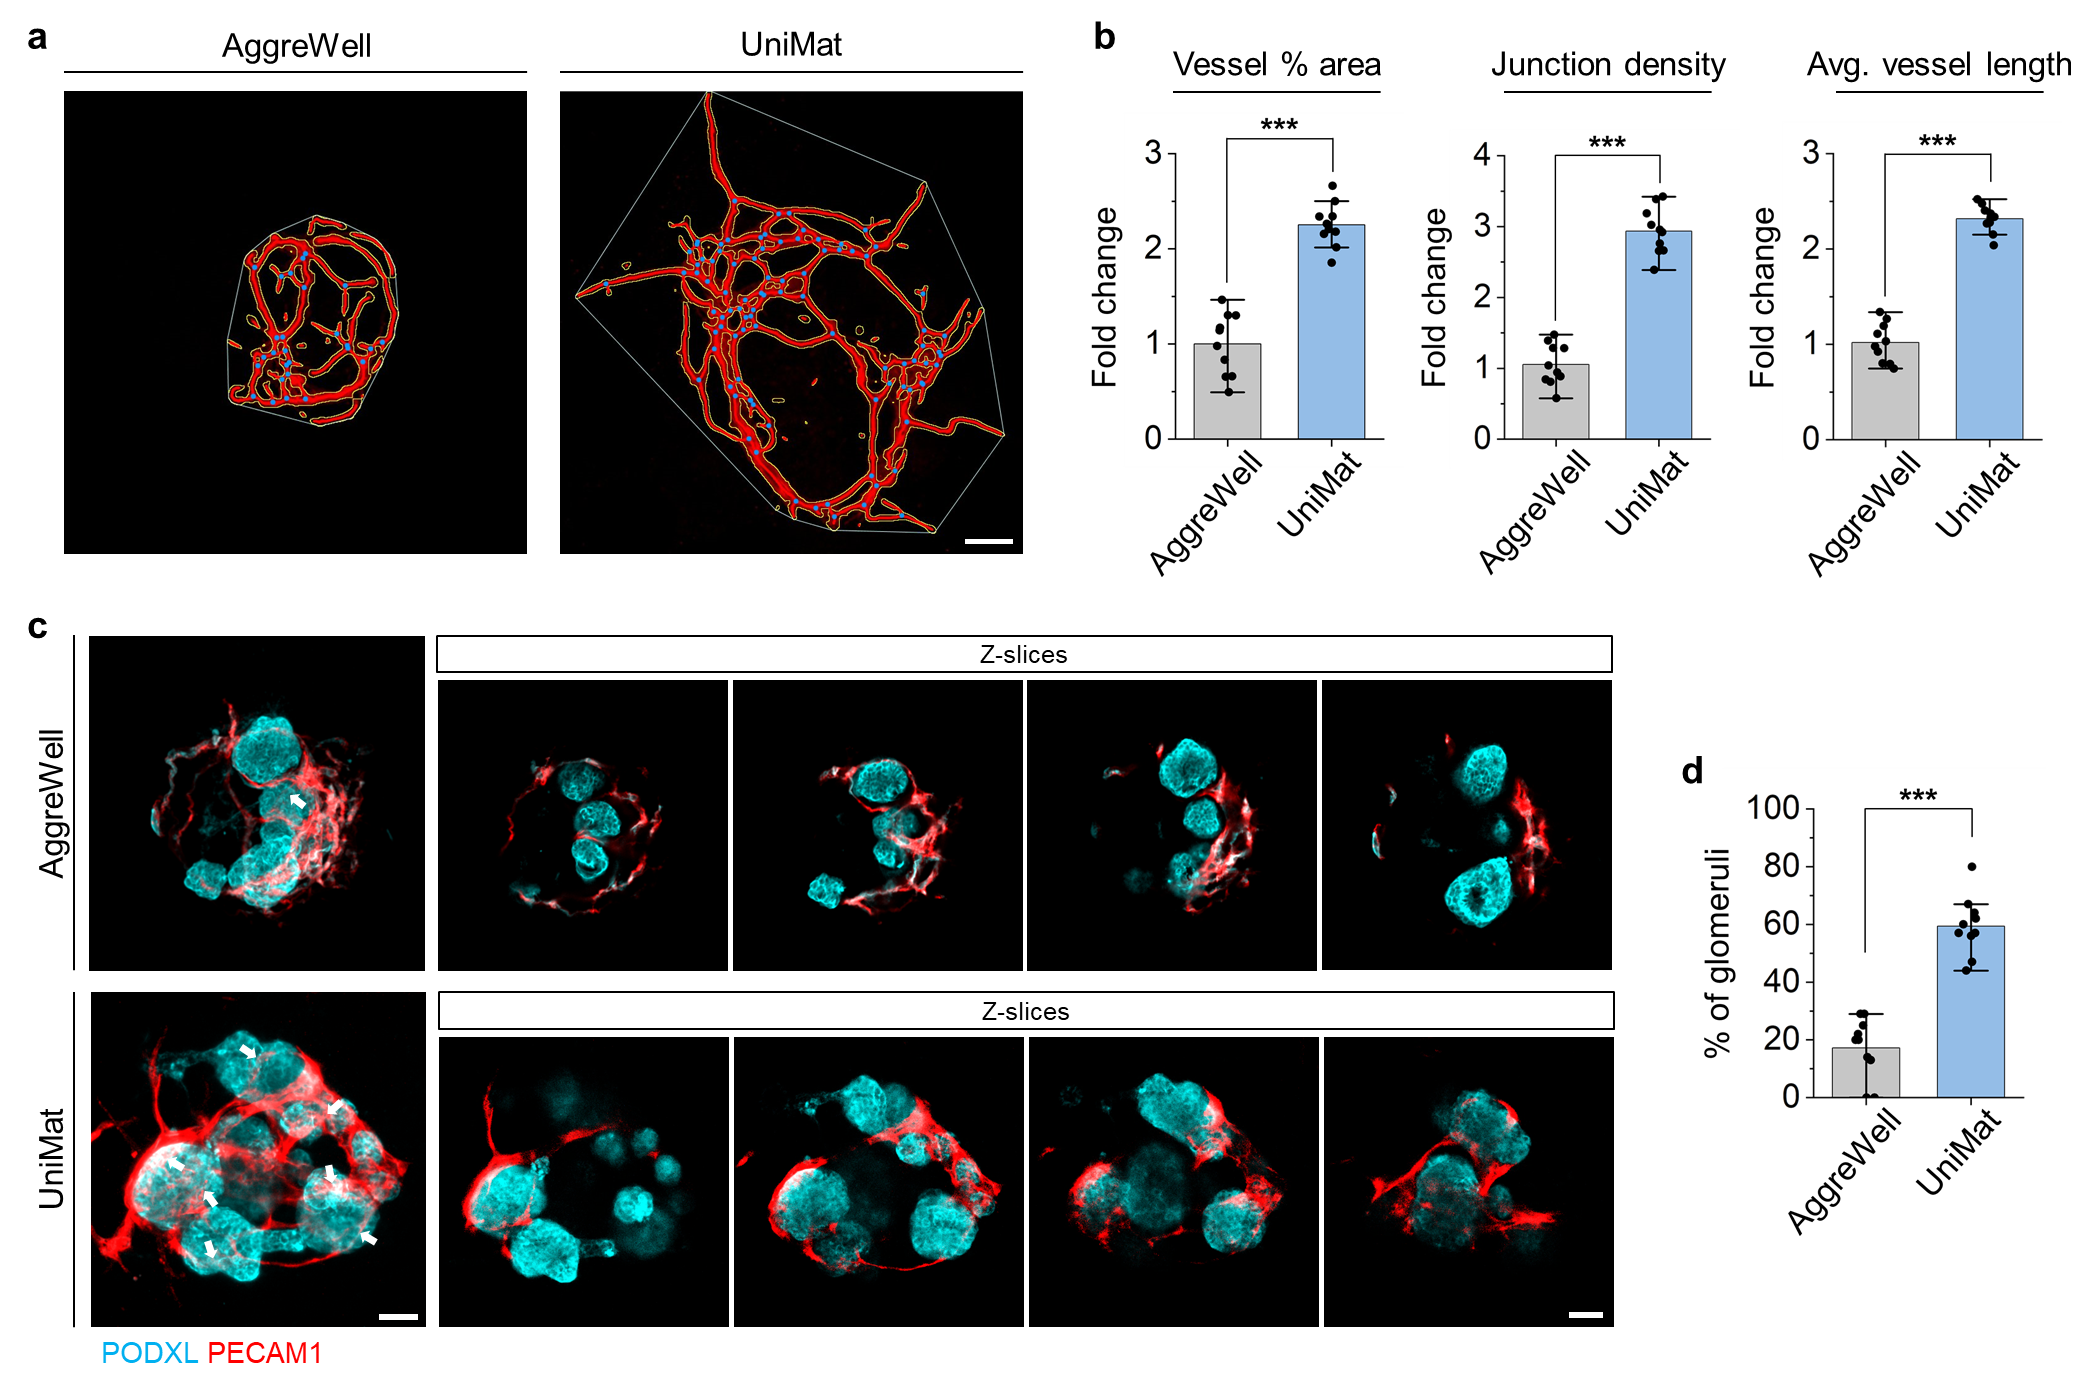
 **Supplementary Figure 6. Enhanced vascularization of hiPSCs-derived kidney organoids in UniMat.** (a) Result images from AngioTool analysis of kidney organoids cultured in AggreWell and UniMat. Scale bar = 50 µm. (b) AngioTool outputs of abundance and character of vasculature of kidney organoids cultured in AggreWell and UniMat (reported as fold change relative to AggreWell-cultured organoids). (n = 10; ****P* < 0.0001). (c) Sequential individual confocal z-slice images of kidney organoids cultured in AggreWell and UniMat, stained with PODXL (cyan) and PECAM1 (red). Scale bar = 20 µm. White arrows indicate invasion of PECAM1+ endothelial cells into PODXL+ podocytes clusters. (d) Quantification of percentage of PECAM1+ endothelial cells invasion into glomerular-like structure in kidney organoids cultured in AggreWell and UniMat (n = 10; ****P* < 0.0001).


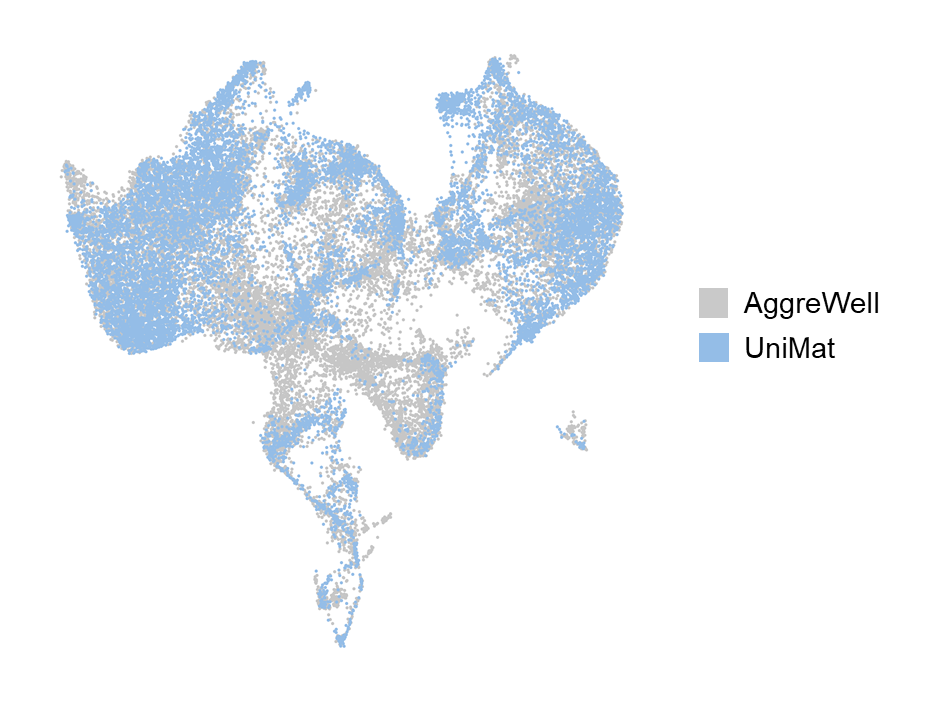


**Supplementary Figure 7. UMAP plot of distribution of kidney organoid cells in AggreWell and UniMat.**


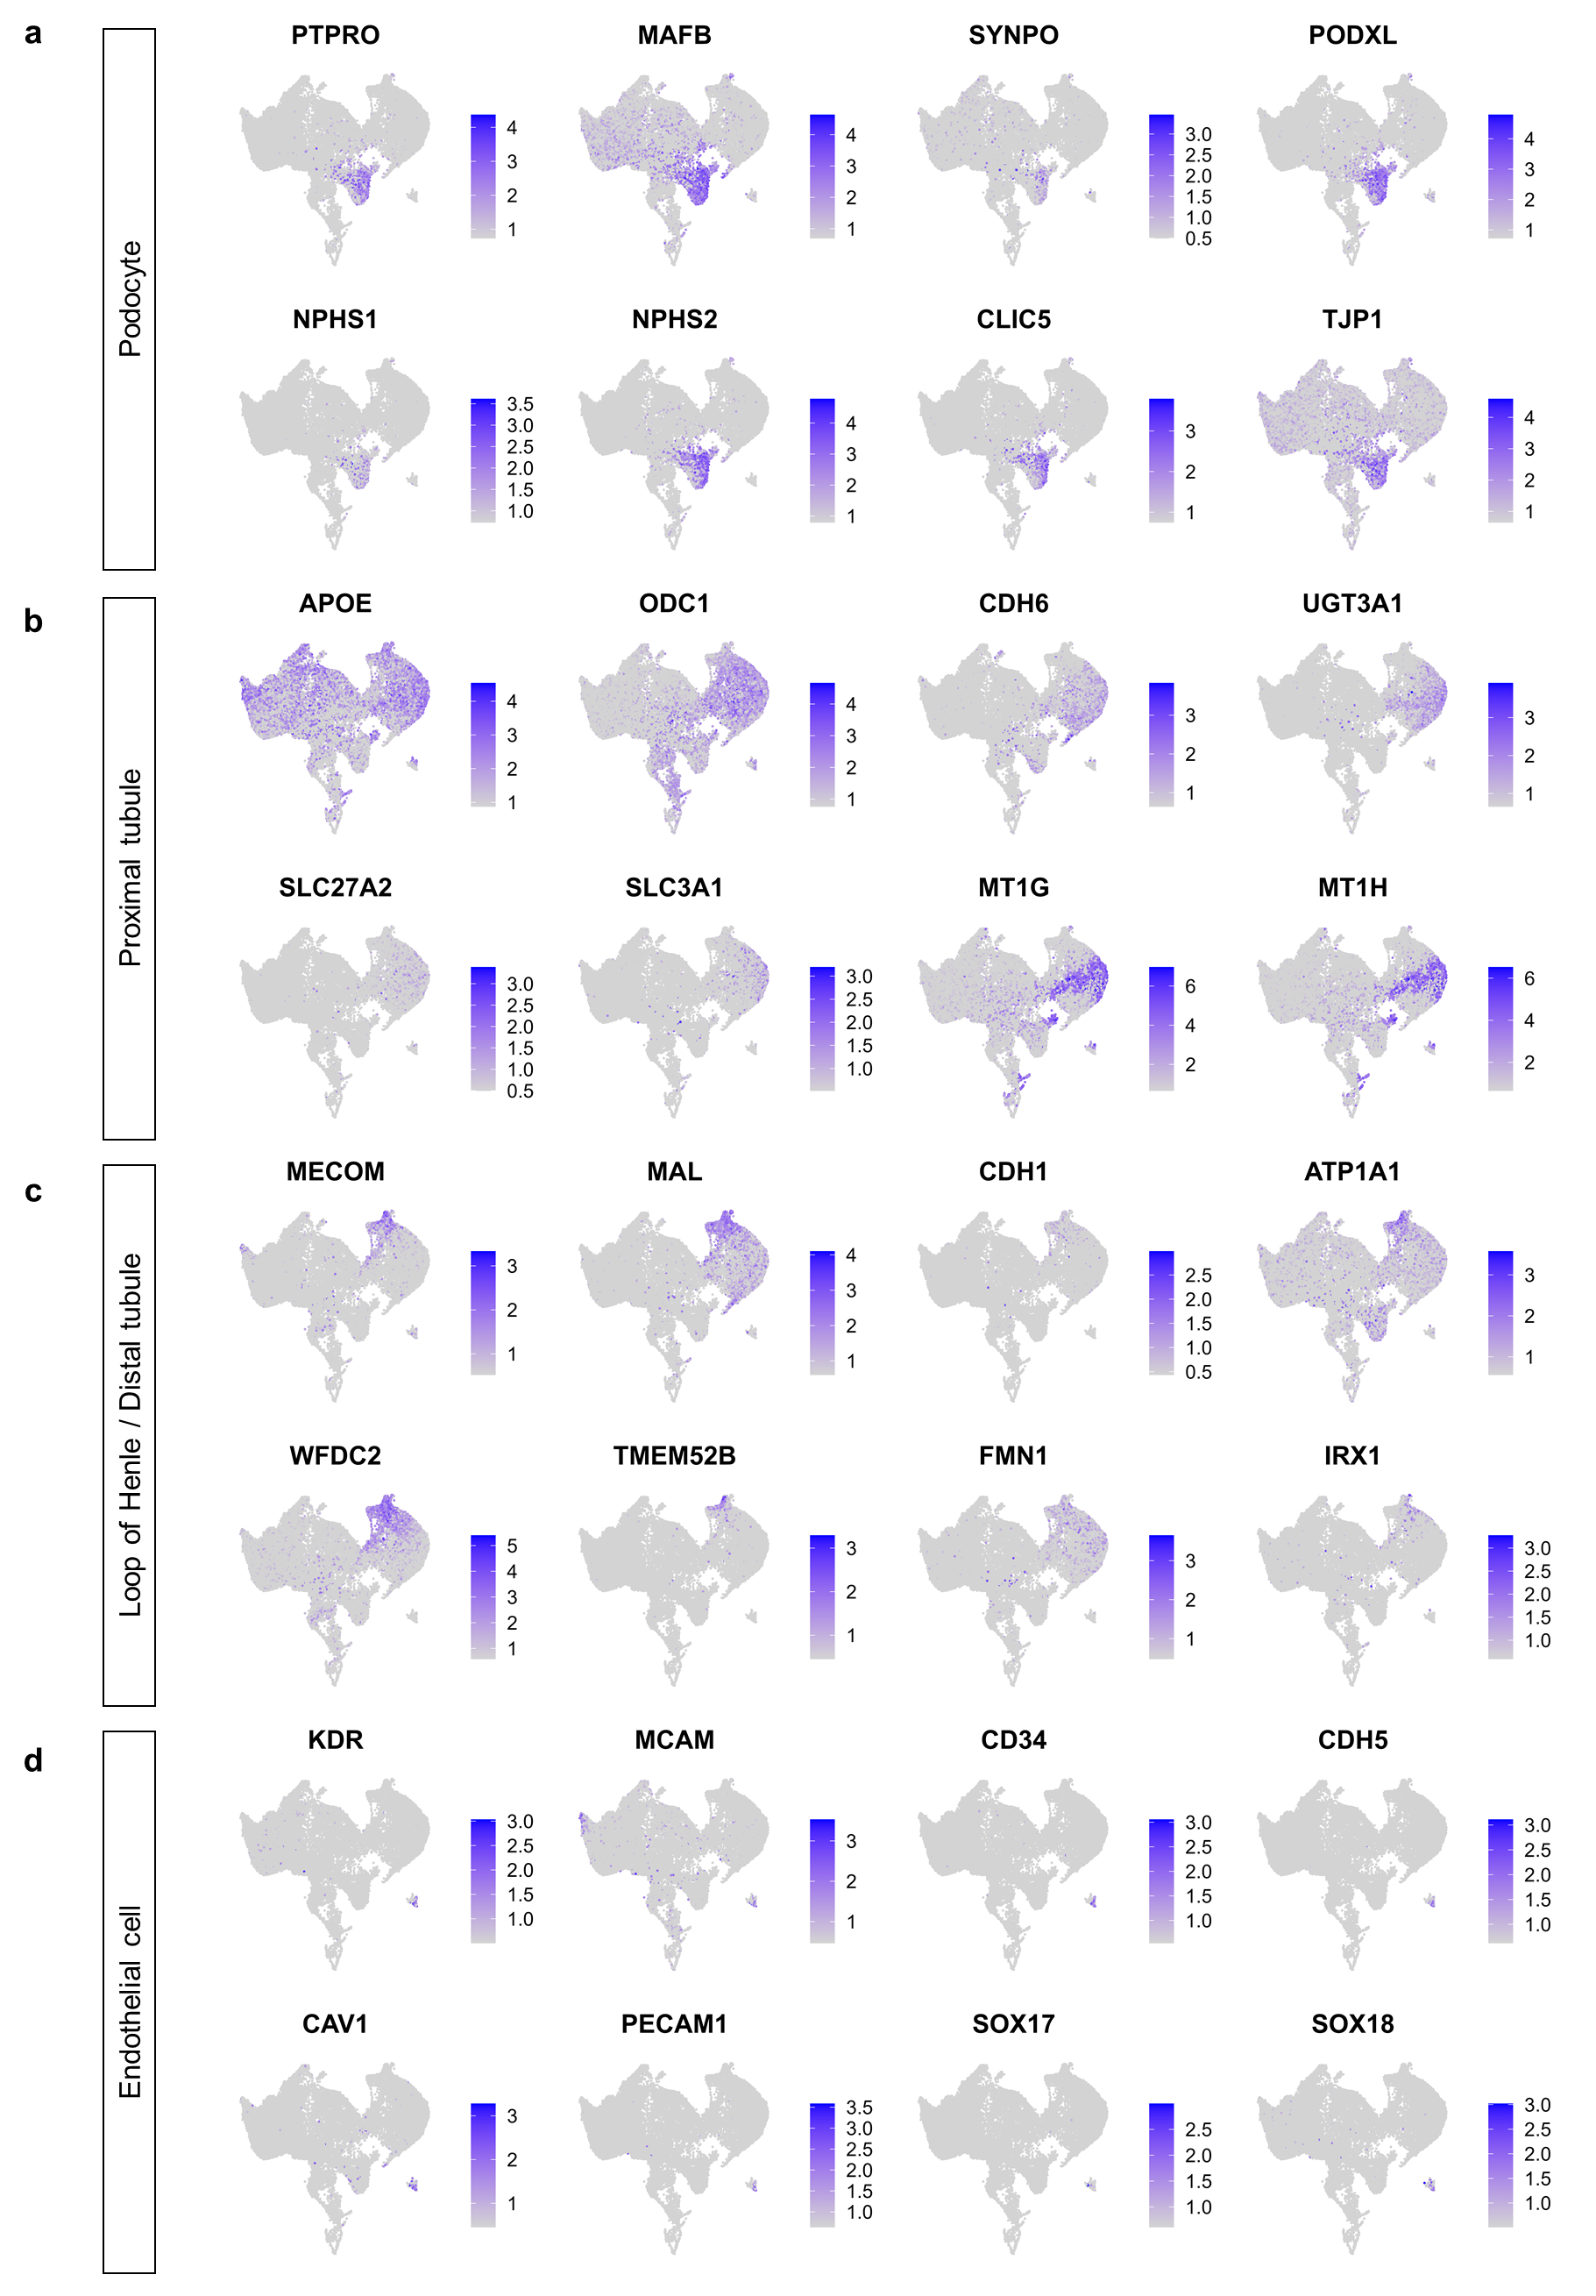


**Supplementary Figure 8. UMAP plots of gene expression of kidney organoid cells in AggreWell and UniMat.** (a) Podocyte-specific genes. (b) Proximal tubule-specific genes. (c) Loop of Henle/distal tubule-specific genes. (d) Endothelial cell-specific genes.


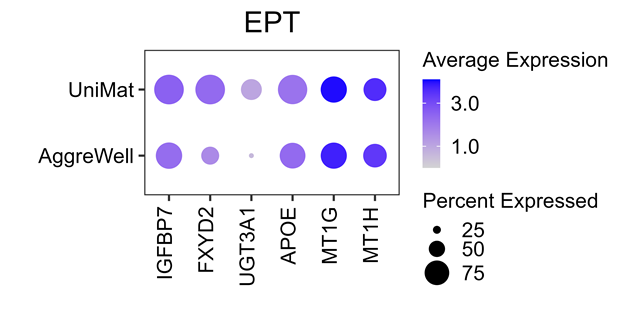


**Supplementary Figure 9. Comparison of proportion of early proximal tubules (EPT) between AggreWell and UniMat.** Dot plot comparing expression of proximal tubule signatures genes in EPT cluster between AggreWell and UniMat.


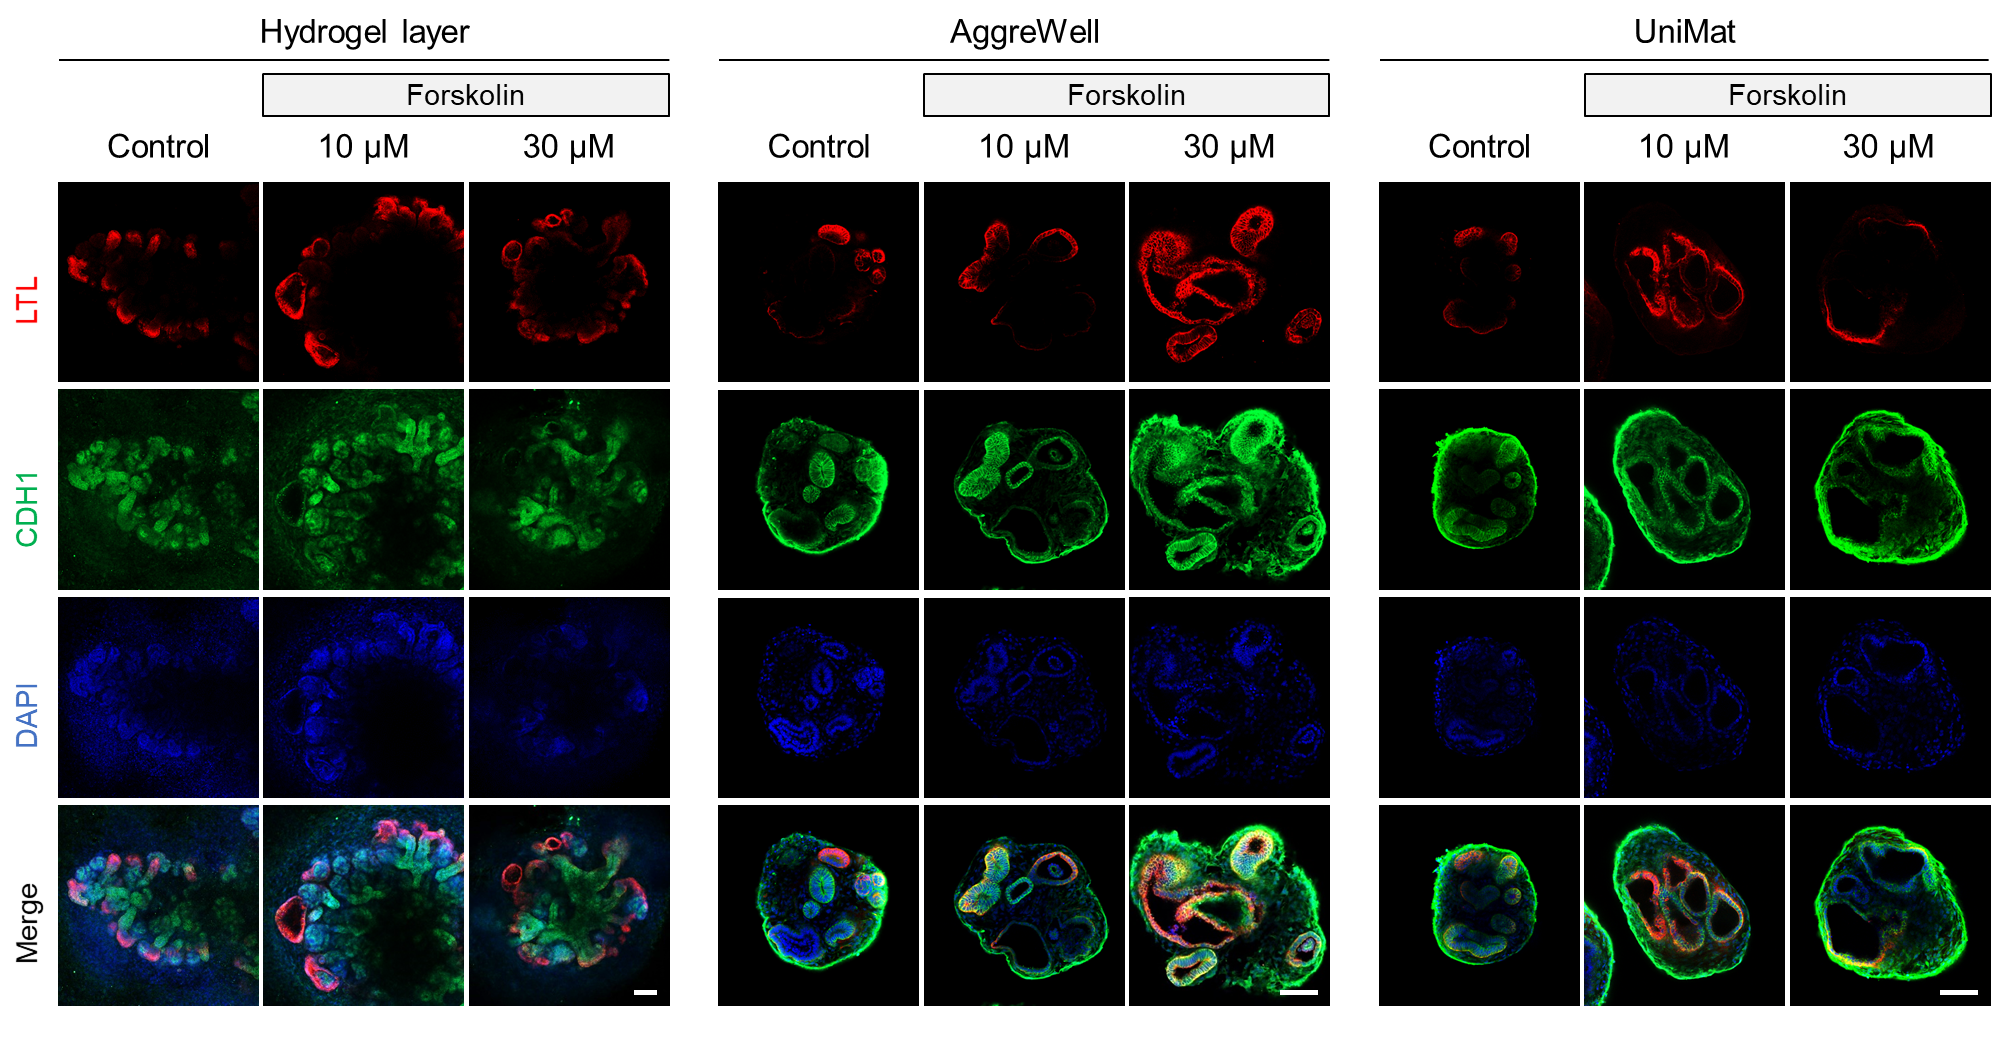


**Supplementary Figure 10. Confocal images of polycystic kidney disease (PKD) organoids.** Confocal images of forskolin-treated PKD organoids induced from kidney organoids differentiated in hydrogel layer, AggreWell, and UniMat. Scale bars = 100 µm.

**Supplementary Video Captions**

**Supplementary Video 1. Confocal z-stack movie of kidney organoids cultured in AggreWell stained with PODXL (cyan) and PECAM1 (red)**

**Supplementary Video 2. Confocal z-stack movie of kidney organoids cultured in UniMat stained with PODXL (cyan) and PECAM1 (red)**

**References**

1. Morizane, R. & Bonventre, J.V. Generation of nephron progenitor cells and kidney organoids from human pluripotent stem cells. *Nat Protoc* **12** (2017).

2. Singh, H., Teoh, S.H., Low, H.T. & Hutmacher, D.W. Flow modelling within a scaffold under the influence of uni-axial and bi-axial bioreactor rotation. *J Biotechnol* **119**, 181-196 (2005).

3. Provin, C., Takano, K., Sakai, Y., Fujii, T. & Shirakashi, R. A method for the design of 3D scaffolds for high-density cell attachment and determination of optimum perfusion culture conditions. *J Biomech* **41**, 1436-1449 (2008).

4. Rousset, N., Monet, F. & Gervais, T. Simulation-assisted design of microfluidic sample traps for optimal trapping and culture of non-adherent single cells, tissues, and spheroids. *Sci Rep-Uk* **7** (2017).
